# Supplementary material
Source: ML conference proceedings conference paper supplement (https://proceedings.mlr.press/v89/paananen19a.html)
Supplement: Supplementary file 1 [file paananen19a-supp.pdf]

## SUPPLEMENTARY MATERIAL

### KL Method Relevance Measure Equations

#### Gaussian Observation Model

For a Gaussian observation model, the predictive distribution of a Gaussian process model at a single test point is a univariate normal distribution. Let us denote the mean and variance of the predictive distribution at test point  $\mathbf{x}^{(i)}$  as  $\mu_i = \mathbb{E}[y_* | \mathbf{x}^{(i)}, \mathbf{y}]$  and  $\sigma_i^2 = \text{Var}[y_* | \mathbf{x}^{(i)}, \mathbf{y}]$ , respectively. Analogously, denote the mean and variance of the predictive distribution at the perturbed point as  $\mu_{i,\Delta_j} = \mathbb{E}[y_* | \mathbf{x}^{(i)} + \Delta_j, \mathbf{y}]$  and  $\sigma_{i,\Delta_j}^2 = \text{Var}[y_* | \mathbf{x}^{(i)} + \Delta_j, \mathbf{y}]$ . The KL divergence between these distributions is

$$\log \frac{\sigma_{i,\Delta_j}}{\sigma_i} + \frac{\sigma_i^2 + (\mu_i - \mu_{i,\Delta_j})^2}{2\sigma_{i,\Delta_j}^2} - \frac{1}{2}.$$

The measure of predictive relevance in equation (2) is then

$$r(i, j, \Delta) = \frac{\sqrt{2}}{\Delta} \sqrt{\log \frac{\sigma_{i,\Delta_j}}{\sigma_i} + \frac{\sigma_i^2 + (\mu_i - \mu_{i,\Delta_j})^2}{2\sigma_{i,\Delta_j}^2} - \frac{1}{2}}.$$

#### Binary Classification

Consider a binary classification problem modelled with a Gaussian process. The predictive distribution at test point  $\mathbf{x}^{(i)}$  is a Bernoulli distribution with success probability denoted as  $\pi_* = p(y_* = 1 | \mathbf{x}^{(i)}, \mathbf{y})$ . The KL divergence between this distribution and the predictive distribution at a perturbed point, with success probability  $\pi_{*,\Delta_j} = p(y_* = 1 | \mathbf{x}^{(i)} + \Delta_j, \mathbf{y})$ , is then

$$\pi_* \log \frac{\pi_*}{\pi_{*,\Delta_j}} + (1 - \pi_*) \log \frac{1 - \pi_*}{1 - \pi_{*,\Delta_j}}.$$

The measure of predictive relevance in equation (2) is then

$$r(i, j, \Delta) = \frac{\sqrt{2}}{\Delta} \sqrt{\pi_* \log \frac{\pi_*}{\pi_{*,\Delta_j}} + (1 - \pi_*) \log \frac{1 - \pi_*}{1 - \pi_{*,\Delta_j}}}.$$

#### Sensitivity of the KL Method to perturbation size $\Delta$

We repeated the toy example from Section 4.1 and computed the KL relevance estimates with different values of the perturbation size  $\Delta$ . All of the independent input variables have a uniform distribution  $U(-1, 1)$  and thus have a standard deviation of  $1/\sqrt{3}$ . Computed relevance estimates of the eight variables averaged from

50 data realizations are plotted in Figure 7. For reasonably small  $\Delta$  values the results are identical. The results differ only when  $\Delta$  is smaller than  $10^{-7}$  or larger than  $10^{-2}$ .  $\Delta = 10^{-4}$  is a safe choice for most purposes unless the inputs have very small length-scale. In that case, one can make  $\Delta$  smaller but should be cautious of numerical errors.

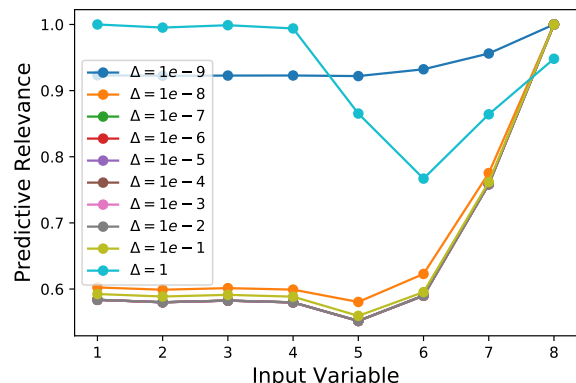

Figure 7: Relevance estimates given by the KL method for eight covariates in the toy example where each variable is equally relevant. The results are averaged over 50 data realizations and scaled so that the most relevant covariate has a relevance of one.

#### In-depth Look at Ranking Variability

To see the effect of ranking variability more clearly, we plotted markers for the variable ranks from each training split based on 50 training sets from the four regression data sets, and the results are presented in Figure 8. The markers are jittered horizontally to better illustrate the number of times each variable was assigned a specific relevance rank. The variables are ordered from left to right in terms of highest average relevance given by the KL method. A similar plot for the Pima Indians data set is shown in Figure 9.

For example, the plot of the Concrete data reveals the fact that the improved predictive performance in the chosen submodels is not only the result of being able to identify linear but relevant variables, but is also partly a result of less variation between different training sets. For example, the better performance in the submodel with six variables in Figure 3 is strictly the result of choosing variable 5 more often than variable 6, because all three methods always pick those two last, but ARD is more unsure about their order. The Housing data plot shows that while both the KL and VAR methods pick variable 5 as the most relevant in a majority of training samples, ARD is has more variability, choosing variables 12, 7, and 4 almost equiprobably.

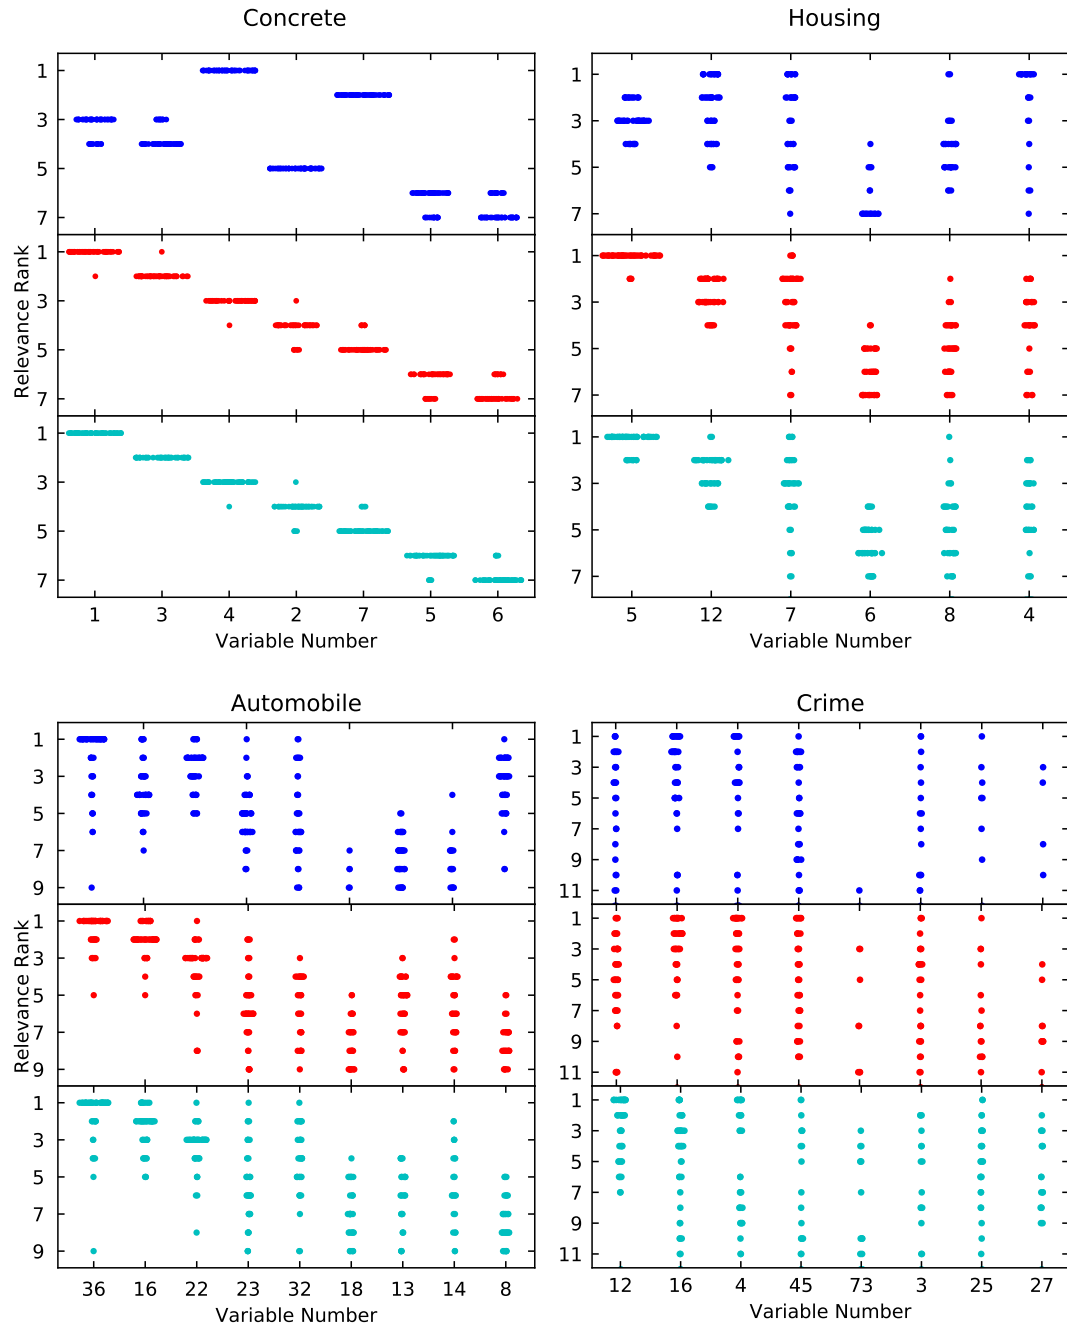

Figure 8: A plot representing the variability in relevance ranks between different training sets in the four regression data sets. Blue, red and cyan points represent ARD, KL and VAR ranking methods, respectively.



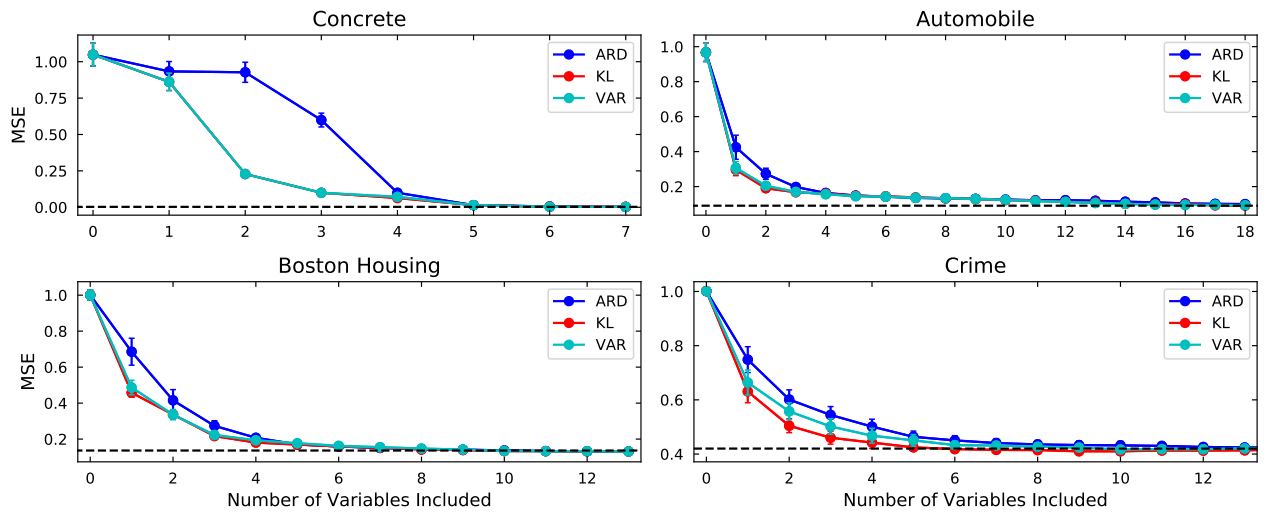

Figure 11: Mean squared errors (MSEs) of the test sets with 95% confidence intervals for submodels as a function of variables included in the submodel. Blue depicts variables sorted using ARD, red and cyan depict the KL and VAR methods, respectively. The dashed horizontal line depicts the MSE of the full model with hyperparameters sampled using the Hamiltonian Monte Carlo algorithm.

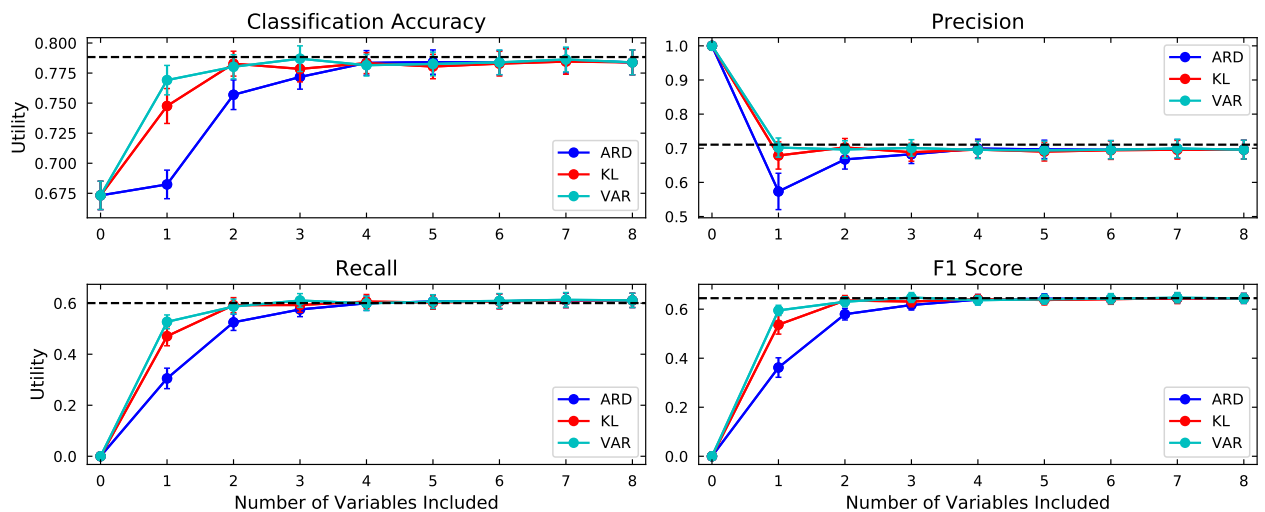

Figure 12: classification accuracy, precision, recall, and the F1 score of the test sets of the Pima Indians data set with 95% confidence intervals for submodels as a function of the number of variables included in the submodel. The dashed horizontal line depicts the utilities of the full model with hyperparameters sampled using the Hamiltonian Monte Carlo algorithm.
